# Supplementary material for: Green synthesis of silver nanoparticles: understanding biological activities – anticancer, antimicrobial, and plasmid DNA cleavage properties through reactive oxygen species release
Source: Royal Society of Chemistry journal article supplement (doi:10.1039/d4nj02350a), 2024-01-01
Supplement: d4nj02350a1.pdf [file d4nj02350a1.pdf]

## **Green Synthesis of Silver Nanoparticles: Understanding Biological Activities - Anticancer, Antimicrobial, and Plasmid DNA Cleavage through Reactive Oxygen Species Release**

**Naseemabee Syed Shabulal<sup>1</sup>, Thiagarajan Perumal<sup>1\*</sup>, Mohammed F. Albeshr<sup>2</sup>, Karuppiyah Nagaraj<sup>3\*</sup>, Gunasekaran Velmurugan<sup>4\*</sup>, Prasenjit Maity<sup>5</sup>, Isai Mathivanan<sup>6</sup>, S.M. Abhijith<sup>3</sup>, Niyati Hemantkumar Lad<sup>3</sup>**

<sup>1</sup>Department of Microbiology, Disease control and Entomology Laboratory, School of Life Sciences, Bharathidasan University, Tiruchirappalli- 620 024, Tamil Nadu, India.

<sup>2</sup>Department of Zoology, College of Sciences, King Saud University, P.O. Box. 2455, Riyadh, 11451, Saudi Arabia

<sup>3</sup>School of Pharmacy, National Forensic Sciences University, 6M56+XP8, Police Bhavan Rd, Sector 9, Gandhinagar, Gujarat 382007, India.

<sup>4</sup>Institute of Inorganic Chemistry, Heidelberg University, Im Neuenheimer Feld 275, Heidelberg - 69120, Germany.

<sup>5</sup>School of Engineering and Technology, National Forensic Sciences University, 6M56+XP8, Police Bhavan Rd, Sector 9, Gandhinagar, Gujarat 382007, India.

<sup>6</sup>Research Department of Zoology, Seethalakshmi Ramaswami College (Autonomous), Affiliated to Bharathidasan University, Tiruchirappalli, Tamil Nadu, India.

\*Corresponding author

E- mail: [surfactantnagaraj@gmail.com](mailto:surfactantnagaraj@gmail.com), [velmurugan.gunasekaran@aci.uni-heidelberg.de](mailto:velmurugan.gunasekaran@aci.uni-heidelberg.de)

## Supporting Information

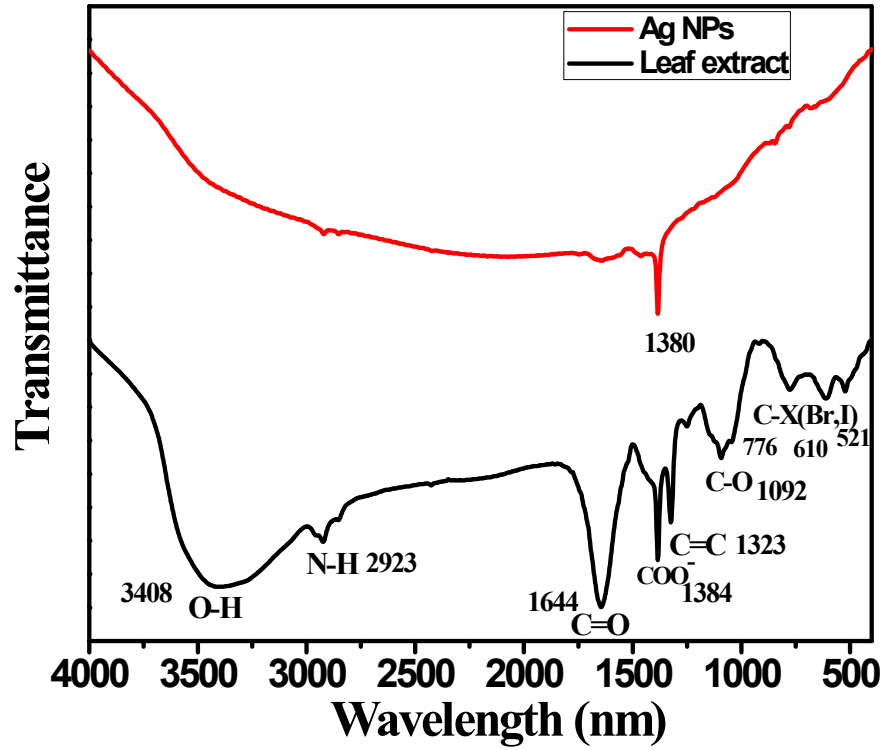

Fig. S1 FTIR spectra of CPL plant leaves extract and CPL-stabilized Ag-NPs.

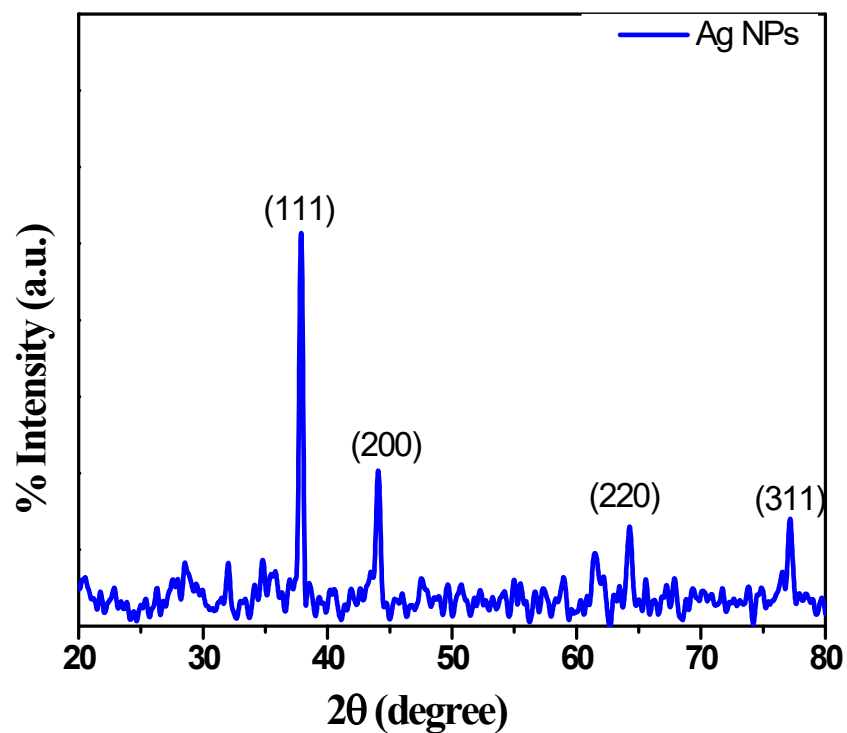

**Fig. S2** XRD spectra of CPL plant leaves extract and CPL-stabilized Ag-NPs.

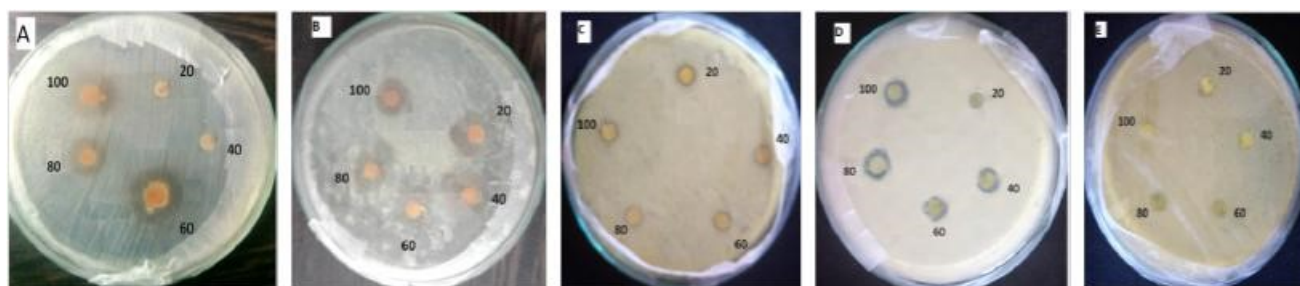

**Fig. S3** Antibacterial Disc diffusion method. Zones of inhibition of biogenic Ag-NPs synthesized from CPL leaves extract, against the pathogenic strains. (A) *Bacillus subtilis*., (B) *Klebsiella pneumoniae*., (C) *Staphylococcus aureus*.,(D) *Escherichia coli*., (E) *Pseudomonas aeruginosa*.

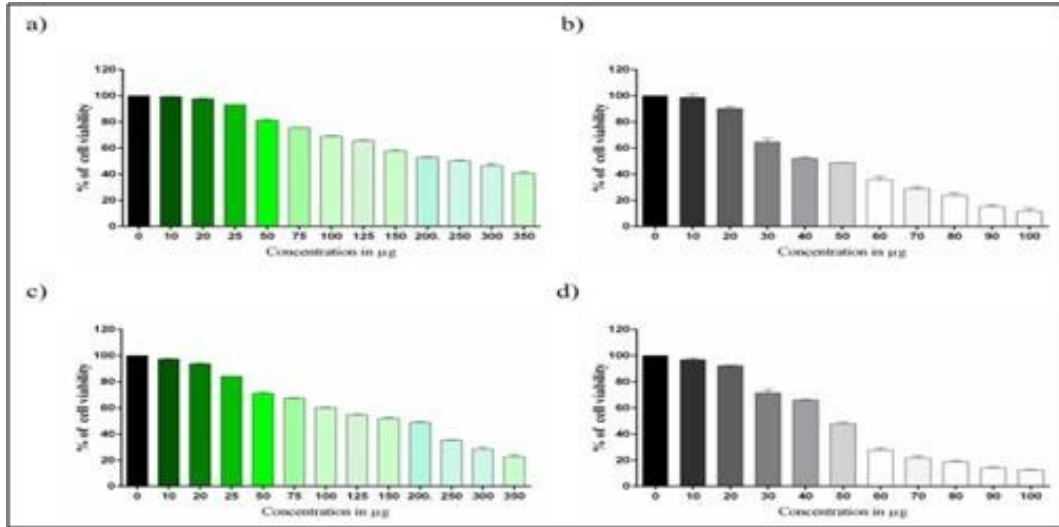

**Fig. S4** **a)** Shows the plant extraction form of CPL induces the reduction of cell viability in dose dependent manner in MCF-7 cells. **b)** Shows the synthesized Ag-NPs produced the loss of cell viability in MCF-7 cells. **c)** Illustrated the plant extraction form CPL induces the reduction of cell viability in dose dependent manner in MDA-MB-231 cells. **d)** Shows synthesized Ag-NPs produced the loss of cell viability in MDA-MB-231 cells.

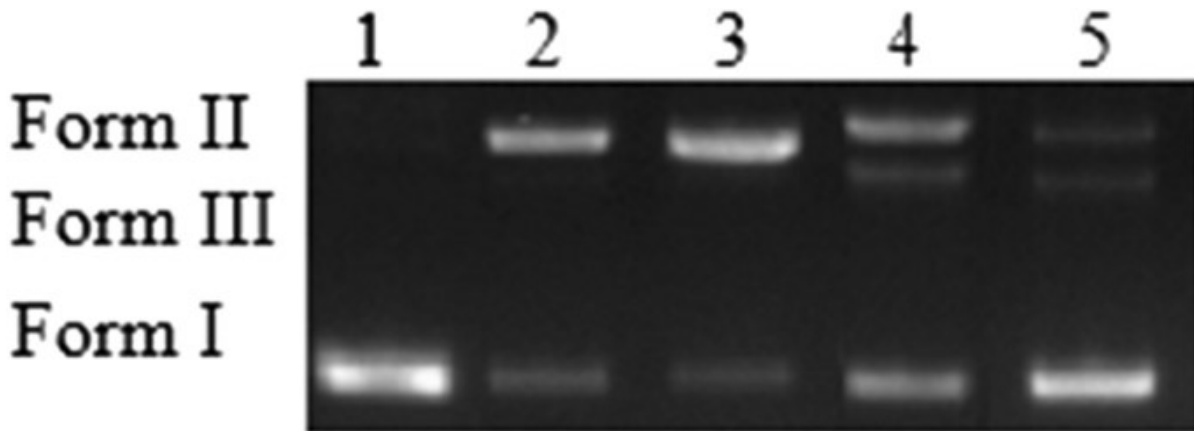

**Fig. S5** Lane 1, pBR 322 DNA+200 mg/ml; Lane 2, pBR 322 DNA + 250 mg/ml Ag-NPs (60 min incubation); Lane 3, pBR 322 DNA + 300 mg/ml Ag-NPs (60 min incubation).
